# Supplementary material for: Structure-based design of chimeric antigens for multivalent protein vaccines
Source: PubMed Central journal article supplement (PMC5849709; doi:10.1038/s41467-018-03146-7), 2018-03-13
Supplement: 41467_2018_3146_MOESM1_ESM.pdf [file 41467_2018_3146_MOESM1_ESM.pdf]

# Structure-based design of chimeric antigens for multivalent protein vaccines

Hollingshead et al.

Supplementary Information

**Supplementary Figure 1. Differential scanning calorimetry.**

**Supplementary Figure 2. Structural alignments of ChAs with wild type fHbp.**

**Supplementary Figure 3. Surface plasmon resonance of CFH<sub>67</sub> interacting with ChAs.**

**Supplementary Figure 4. Flow cytometry histograms showing detection of fHbp and PorA by ChA antisera.**

**Supplementary Figure 5. Complete gel and Western blots from Figure 1C.**

**Supplementary Figure 6. Complete gel and Western blots from Figure 2B.**

**Supplementary Figure 7. Complete gel and Western blots from Figure 2D.**

**Supplementary Figure 8. Complete gel and Western blots from Figure 4E.**

**Supplementary Figure 9. Complete gel and Western blots from Figure 4F.**

**Supplementary Table 1: ChA nomenclature**

**Supplementary Table 2: *Neisseria meningitidis* strains**

**Supplementary Table 3: *Escherchia coli* strains**

**Supplementary Table 4: Primers**

**Supplementary Table 5: Data collection and refinement statistics.**

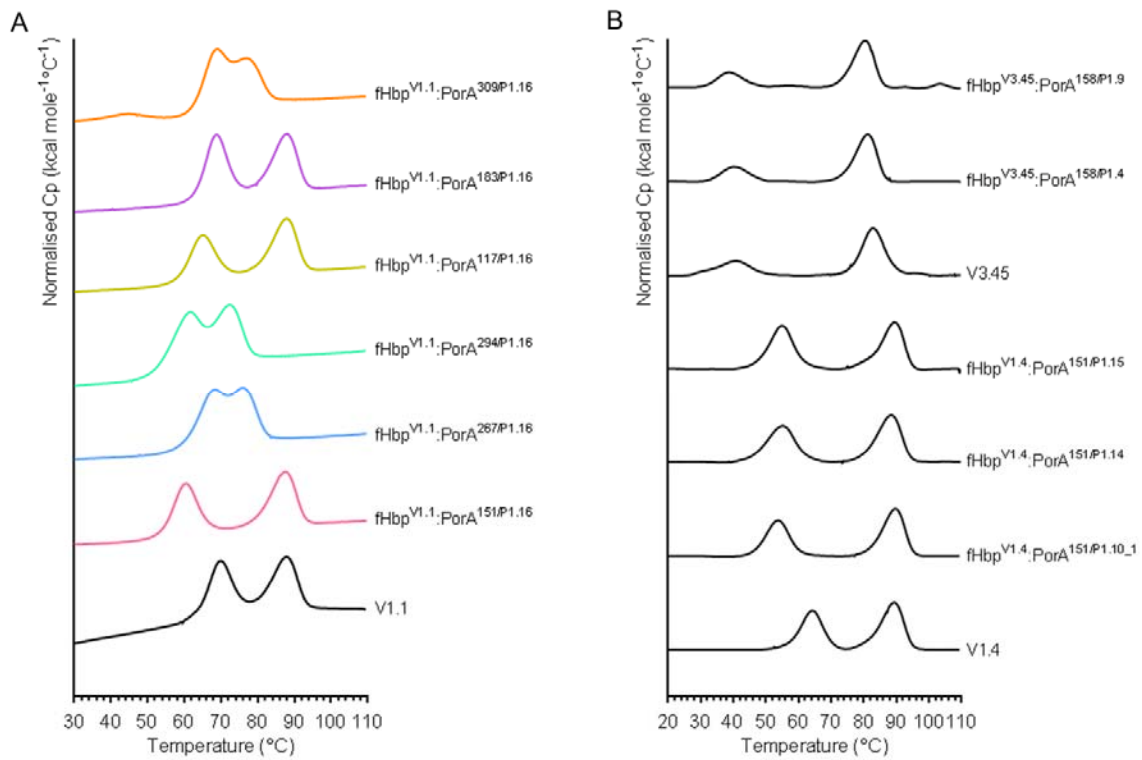

**Supplementary Figure 1. Differential scanning calorimetry.**

Normalised thermal melt traces of ChAs composed of **(A)** fHbp V1.1 and PorA VR2 P1.16, or **(B)** fHbp V1.4 and VR2 peptides P1.10\_1, P1.14 and P1.15 inserted at position 151, or fHbp V3.45 and VR2 peptides P1.4 or P1.9 inserted at position 158.

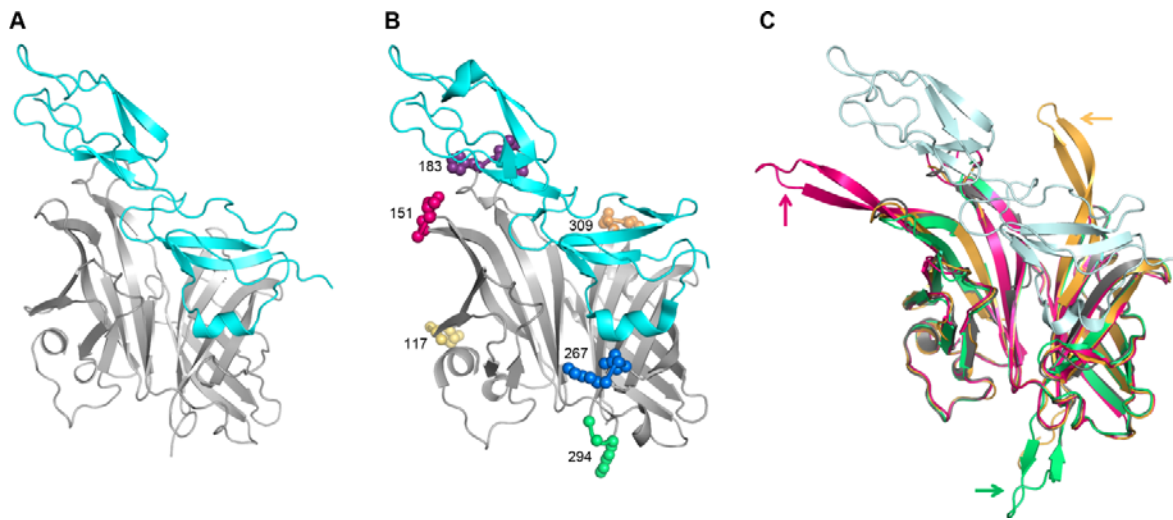

**Supplementary Figure 2. Structural alignments of ChAs with wild type fHbp.**

(A) Complex formed by V1.1 fHbp (grey) and CFH<sub>6/7</sub> (cyan, PDB ID 2W80). (B) Locations of the six fHbp residues replaced with VR2 P1.16 in relation to the CFH<sub>6/7</sub>. (C) Secondary structure alignment of ChAs with fHbp V1.1 (grey) in a complex with CFH<sub>6/7</sub> (light blue); fHbp<sup>V1.4</sup>:PorA<sup>151/P1.16</sup> (pink), fHbp<sup>V1.1</sup>:PorA<sup>294/P1.16</sup> (green), fHbp<sup>V1.4</sup>:PorA<sup>309/P1.16</sup> (orange), VR2 P1.16 is indicated by the correspondingly coloured arrows.

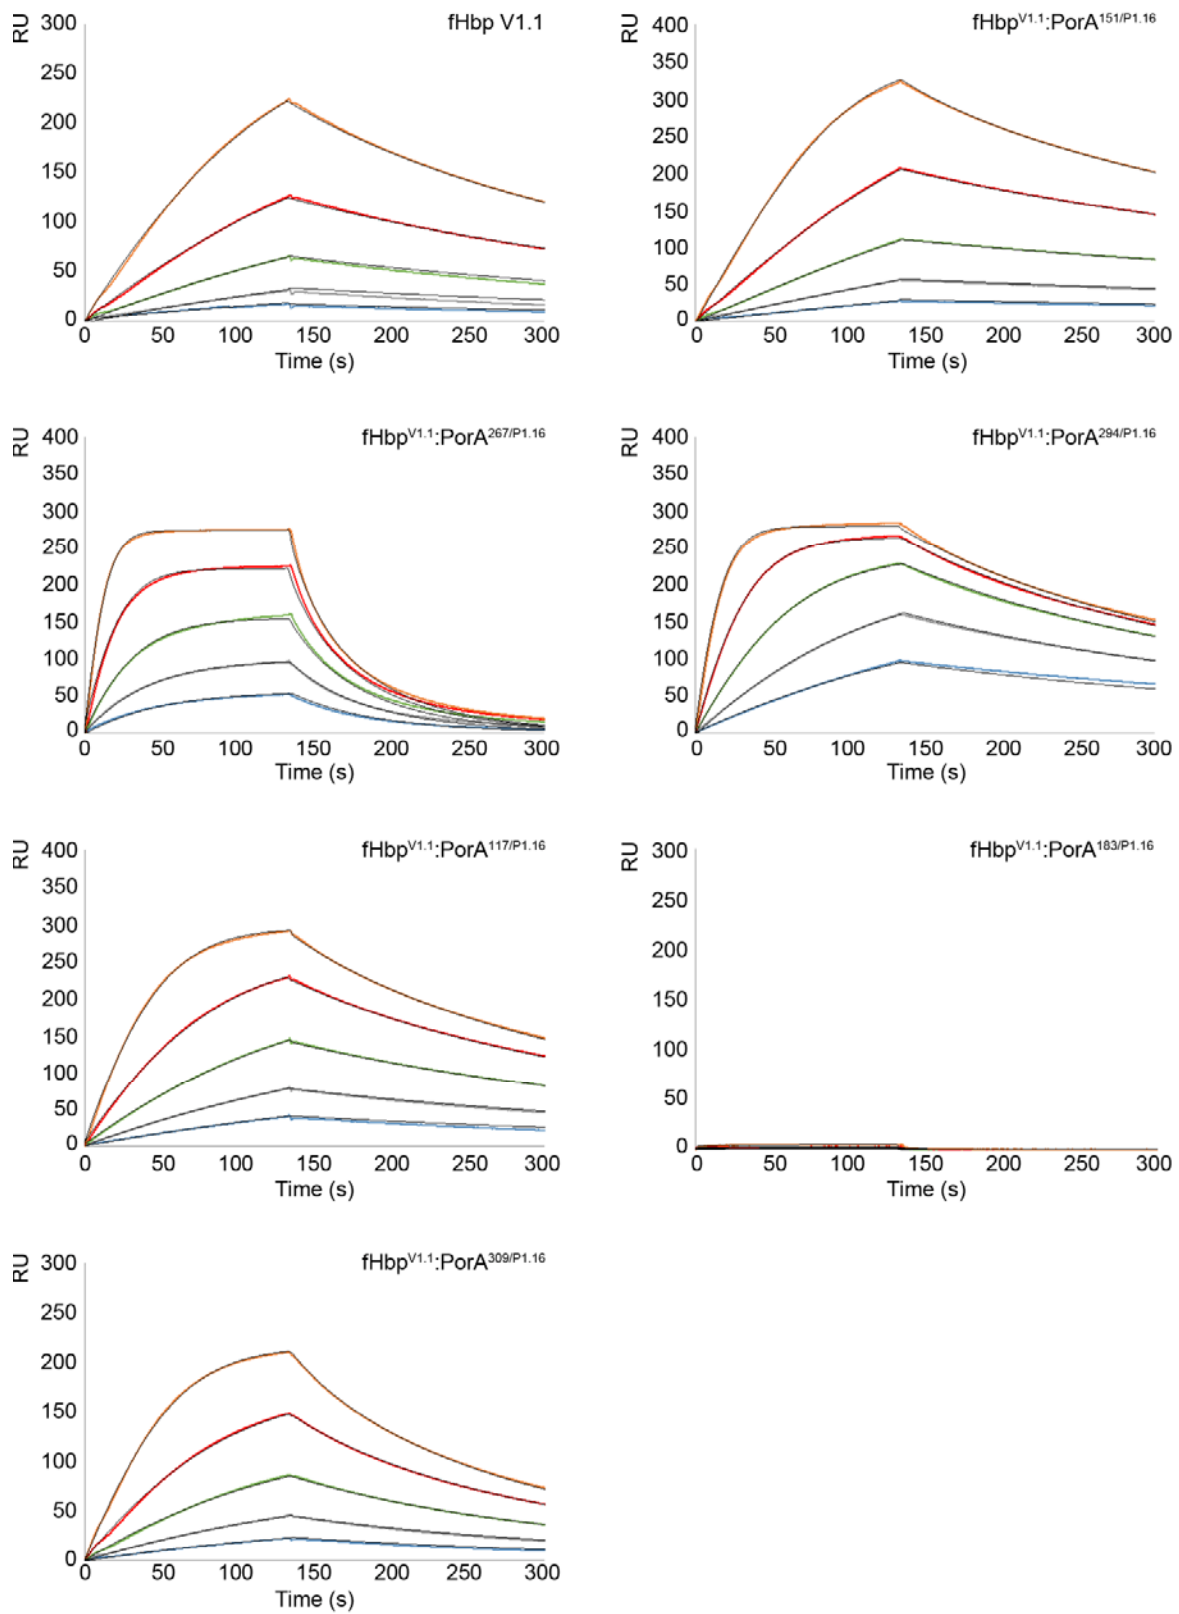

**Supplementary Figure 3. Surface plasmon resonance of CFH<sub>67</sub> interacting with ChAs.**

The ChA was immobilized on the chip surface and increasing concentrations of CFH<sup>67</sup> flowed over the surface: 1nM (blue), 2nM (grey), 4nM (green), 8nM (red), 16nM (orange). Binding was analyzed using the BiaEvaluation software and the fits to the curves are shown as black lines. Kd values are reported in **Table 1**.

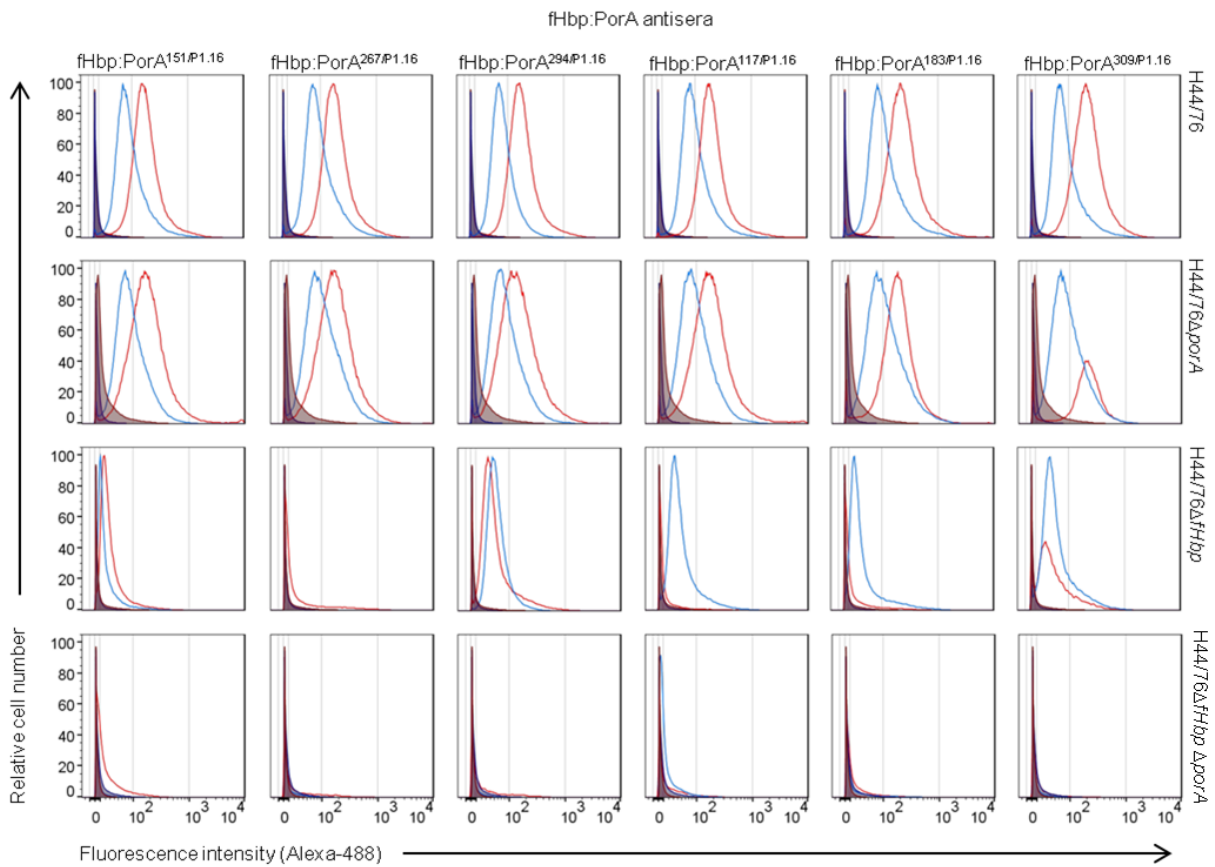

**Supplementary Figure 4. Flow cytometry histograms showing detection of fHbp and PorA by ChA antisera.** Histograms of flow cytometry experiments conducted with ChA/alum (blue) and ChA/MPLA (red) antisera binding to fixed *N. meningitidis* H44/76 strains: wild type,  $\Delta fHbp$ ,  $\Delta porA$  and  $\Delta fHbp\Delta porA$ . fHbp and PorA antibodies bound to *N. meningitidis* were detected using Alexa-488 conjugated IgA/G/M secondary antibody. Alum PBS and MPLA PBS antisera are shown in dark blue and dark red shaded profiles, and secondary IgAGM control is shown in black. Comparisons of the geometric means from these histograms, and the histograms from two other independent repeats, are shown in **Figures 2C** and **2D**.

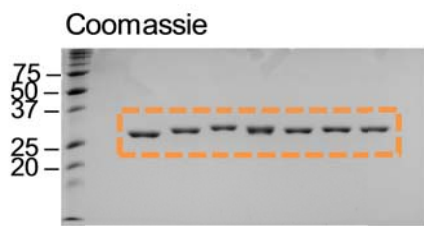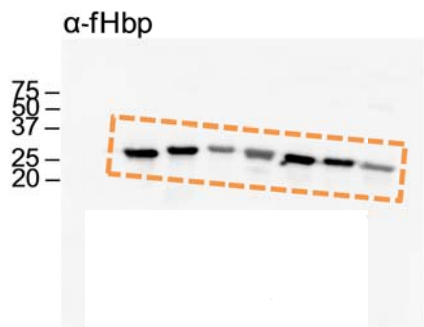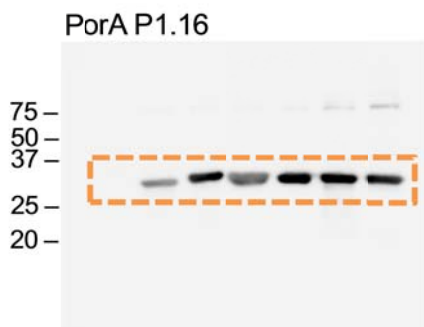

Supplementary Figure 5. Complete gel and Western blots from Figure 1C.

0

Alum + fHbp:PorA<sup>P1.16</sup>

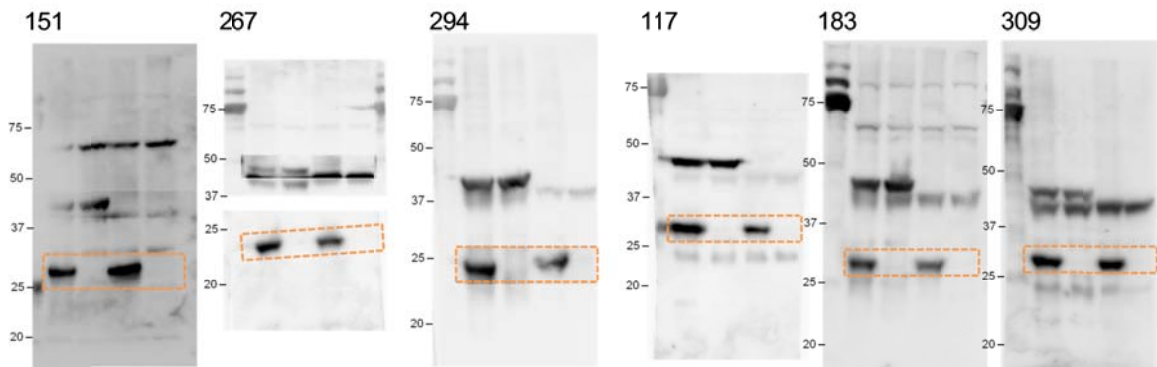

MPLA + fHbp:PorA<sup>P1.16</sup>

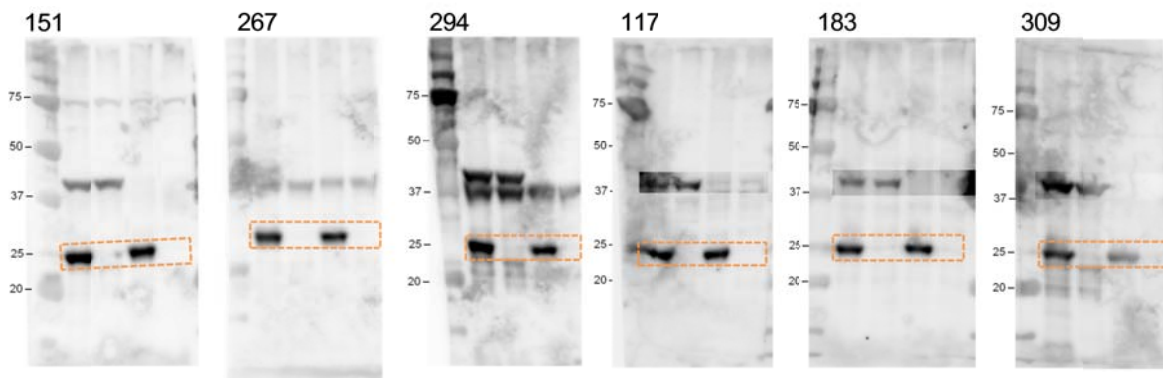

$\alpha$ -V1.1 fHbp

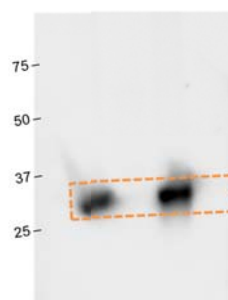

Supplementary Figure 6. Complete Western blots from Figure 2B.



Alum + fHbp:PorA<sup>P1.16</sup>

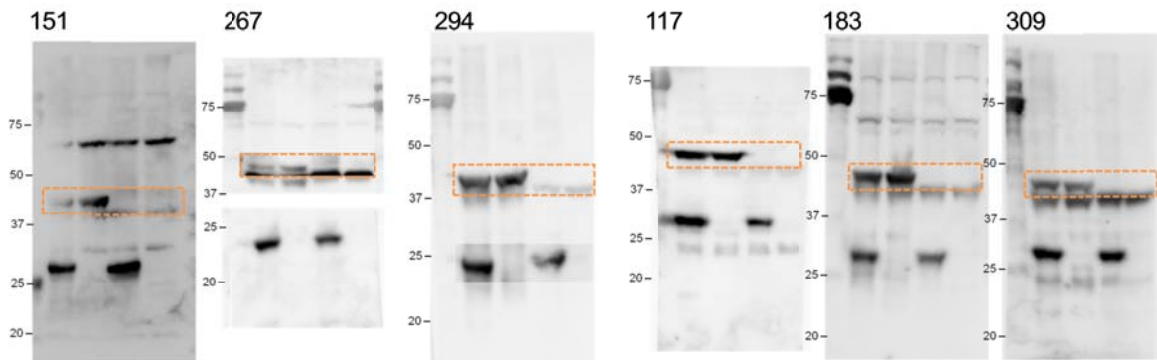

MPLA + fHbp:PorA<sup>P1.16</sup>

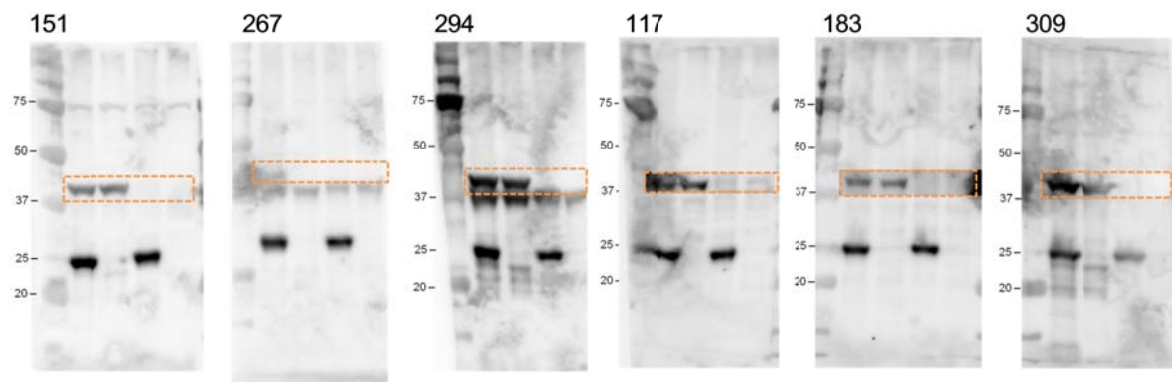

$\alpha$ -PorA P1.16

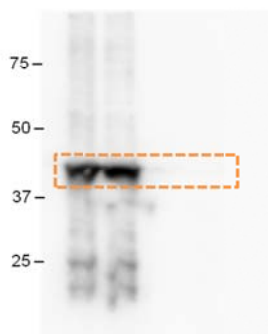

Supplementary Figure 7. Complete Western blots from Figure 2D.

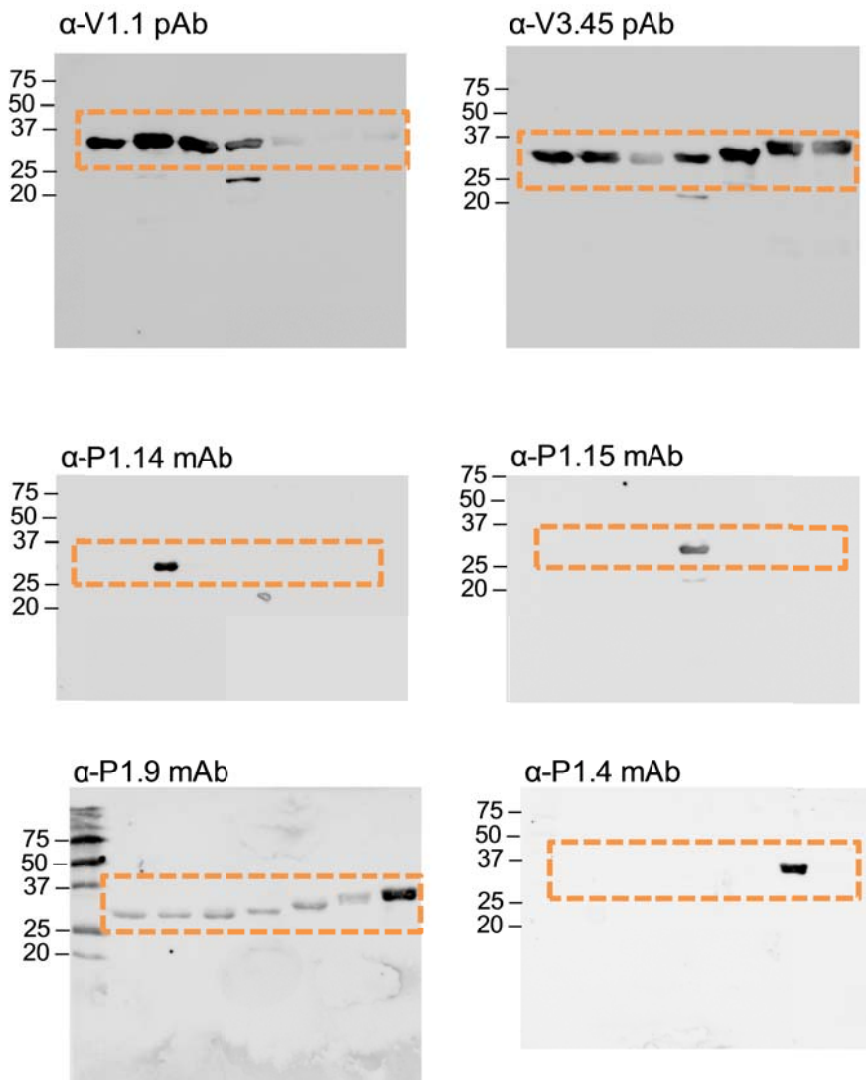

Supplementary Figure 8. Complete Western blots from Figure 4E.

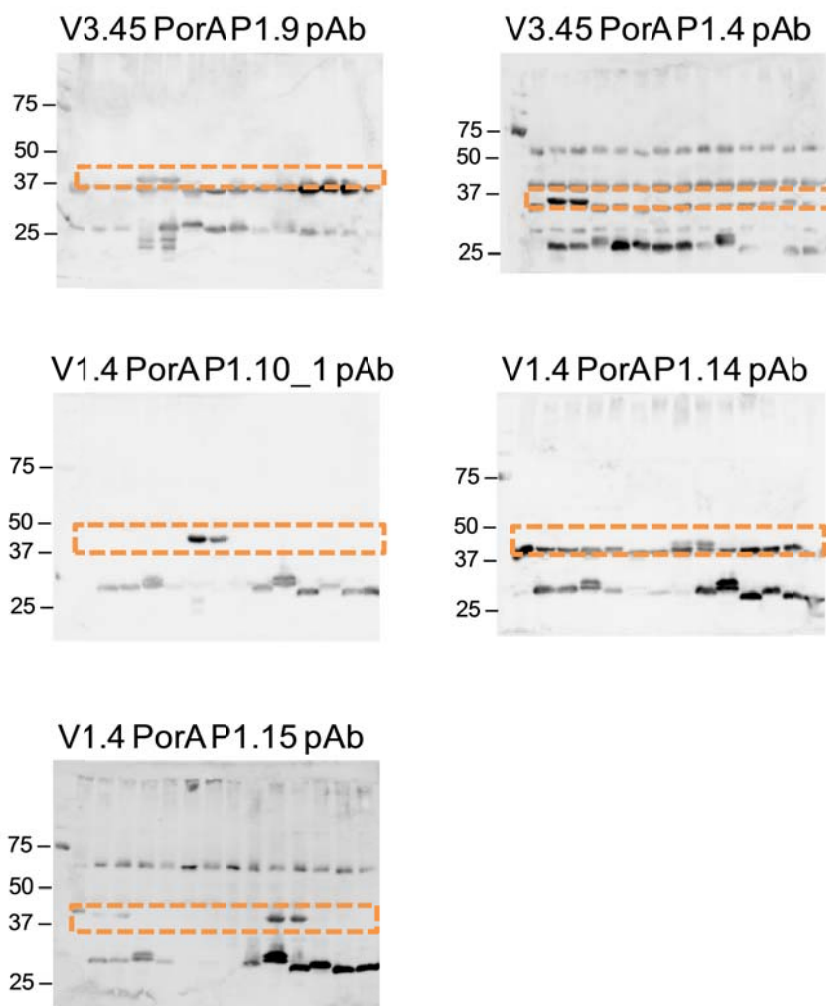

Supplementary Figure 9. Complete Western blots from Figure 4F

**Supplementary Table 1: ChA nomenclature**

| <b>fHbp scaffold</b> | <b>PorA VR2 loop inserted</b> | <b>Residue position of PorA VR2 loop insertion</b> | <b>ChA</b>                                          |
|----------------------|-------------------------------|----------------------------------------------------|-----------------------------------------------------|
| V1.1                 | P1.16                         | 151                                                | fHbp <sup>V1.1</sup> :PorA <sup>151/P1.16</sup>     |
| V1.1                 | P1.16                         | 267                                                | fHbp <sup>V1.1</sup> :PorA <sup>267/P1.16</sup>     |
| V1.1                 | P1.16                         | 294                                                | fHbp <sup>V1.1</sup> :PorA <sup>294/P1.16</sup>     |
| V1.1                 | P1.16                         | 117                                                | fHbp <sup>V1.1</sup> :PorA <sup>117/P1.16</sup>     |
| V1.1                 | P1.16                         | 183                                                | fHbp <sup>V1.1</sup> :PorA <sup>183/P1.16</sup>     |
| V1.1                 | P1.16                         | 309                                                | fHbp <sup>V1.1</sup> :PorA <sup>309/P1.16</sup>     |
| V1.4                 | P1.16                         | 151                                                | fHbp <sup>V1.4</sup> :PorA <sup>151/P1.16</sup>     |
| V1.4                 | P1.16                         | 309                                                | fHbp <sup>V1.4</sup> :PorA <sup>309/P1.16</sup>     |
| V1.4                 | P1.10_1                       | 151                                                | fHbp <sup>V1.4</sup> :PorA <sup>151/P1.1.10_1</sup> |
| V1.4                 | P1.14                         | 151                                                | fHbp <sup>V1.4</sup> :PorA <sup>151/P1.14</sup>     |
| V1.4                 | P1.15                         | 151                                                | fHbp <sup>V1.4</sup> :PorA <sup>151/P1.15</sup>     |
| V3.45                | P1.4                          | 158                                                | fHbp <sup>V3.45</sup> :PorA <sup>158/P1.4</sup>     |
| V3.45                | P1.9                          | 158                                                | fHbp <sup>V3.45</sup> :PorA <sup>158/P1.9</sup>     |

**Supplementary Table 2: *Neisseria meningitidis* strains**

| Strain               | fHbp    | PorA VR1 | PorA VR2 | Year | Serogroup | Source                           |
|----------------------|---------|----------|----------|------|-----------|----------------------------------|
| H44/76               | V1.1    | P1.7     | P1.16    | 1976 | B         | 80                               |
| H44/76ΔfHbp          | deleted | P1.7     | P1.16    | 1976 | B         |                                  |
| H44/76ΔPorA          | V1.1    | P1.7     | deleted  | 1976 | B         |                                  |
| H44/76ΔfHbp<br>ΔPorA | deleted | P1.7     | deleted  | 1976 | B         | This study                       |
| M10.0240129          | V1.92*  | P1.7_2   | P1.4     | 2010 | B         |                                  |
| M10.0240123          | V1.92*  | P1.7_2   | P1.4     | 2010 | B         |                                  |
| M11 240428           | V1.13   | P1.22    | P1.9     | 2011 | B         |                                  |
| M11 240431           | V2.19   | P1.22    | P1.9     | 2011 | B         |                                  |
| M11 240189           | V3.84   | P1.5_1   | P1.10_1  | 2011 | B         | Meningococcal<br>Reference Unit. |
| M11 240287           | V2.584  | P1.5_1   | P1.10_1  | 2011 | B         | Public Health<br>England         |
| M15 240917           | V3.45   | P1.22    | P1.14    | 2015 | B         |                                  |
| M15 240923           | V1.4    | P1.18_1  | P1.14    | 2015 | B         |                                  |
| M07 240902           | V1.220  | P1.19    | P1.15    | 2007 | B         |                                  |
| M08 240404           | V1.1    | P1.19    | P1.15    | 2008 | B         |                                  |
| M11 240382           | V1.4    | P1.12_1  | P1.16    | 2011 | B         |                                  |
| M11 240406           | V1.1    | P1.7     | P1.16    | 2011 | B         |                                  |

\*fHbp truncated at residue 242

**Supplementary Table 3: *Escherichia coli* strains**

| <b>Strain</b> | <b>Plasmid</b>                                             | <b>Protein expressed</b>                            |
|---------------|------------------------------------------------------------|-----------------------------------------------------|
| B834          | pET21b-fHbp <sup>V1.1</sup>                                | V1.1 fHbp                                           |
| B834          | pET21b-fHbp <sup>V1.1</sup> :PorA <sup>151/P1.16</sup>     | fHbp <sup>V1.1</sup> :PorA <sup>151/P1.16</sup>     |
| B834          | pET21b-fHbp <sup>V1.1</sup> :PorA <sup>267/P1.16</sup>     | fHbp <sup>V1.1</sup> :PorA <sup>267/P1.16</sup>     |
| B834          | pET21b-fHbp <sup>V1.1</sup> :PorA <sup>294/P1.16</sup>     | fHbp <sup>V1.1</sup> :PorA <sup>294/P1.16</sup>     |
| B834          | pET21b-fHbp <sup>V1.1</sup> :PorA <sup>117/P1.16</sup>     | fHbp <sup>V1.1</sup> :PorA <sup>117/P1.16</sup>     |
| B834          | pET21b-fHbp <sup>V1.1</sup> :PorA <sup>183/P1.16</sup>     | fHbp <sup>V1.1</sup> :PorA <sup>183/P1.16</sup>     |
| B834          | pET21b-fHbp <sup>V1.1</sup> :PorA <sup>309/P1.16</sup>     | fHbp <sup>V1.1</sup> :PorA <sup>309/P1.16</sup>     |
| B834          | pET21b-fHbp <sup>V1.4</sup> :PorA <sup>151/P1.16</sup>     | fHbp <sup>V1.4</sup> :PorA <sup>151/P1.16</sup>     |
| B834          | pET21b-fHbp <sup>V1.4</sup> :PorA <sup>309/P1.16</sup>     | fHbp <sup>V1.4</sup> :PorA <sup>309/P1.16</sup>     |
| B834          | pET21b-fHbp <sup>V1.4</sup> :PorA <sup>151/P1.1.10_1</sup> | fHbp <sup>V1.4</sup> :PorA <sup>151/P1.1.10_1</sup> |
| B834          | pET21b-fHbp <sup>V1.4</sup> :PorA <sup>151/P1.14</sup>     | fHbp <sup>V1.4</sup> :PorA <sup>151/P1.14</sup>     |
| B834          | pET21b-fHbp <sup>V1.4</sup> :PorA <sup>151/P1.15</sup>     | fHbp <sup>V1.4</sup> :PorA <sup>151/P1.15</sup>     |
| B834          | pET21b-fHbp <sup>V3.45</sup> :PorA <sup>158/P1.4</sup>     | fHbp <sup>V3.45</sup> :PorA <sup>158/P1.4</sup>     |
| B834          | pET21b-fHbp <sup>V3.45</sup> :PorA <sup>158/P1.9</sup>     | fHbp <sup>V3.45</sup> :PorA <sup>158/P1.9</sup>     |

**Supplementary Table 4: Primers**

| <b>Primer Name</b>                                     | <b>Sequence</b>                                                                  |
|--------------------------------------------------------|----------------------------------------------------------------------------------|
| fHbp F1                                                | GCGCATATGGTCGCCGCCGACATCG                                                        |
| fHbp R4                                                | GCGCTCGAGTTGCTTGGCAGCAAGACCGATATGG                                               |
| fHbp <sup>V1.1</sup> :PorA <sup>151/P1.16</sup> R2     | CGCCAAATCGAAGTGGACTACTACACCAAAGACACCAACAACAACCT<br>GACCCTGGTCCAGCTCATTACCTTGGAG  |
| fHbp <sup>V1.1</sup> :PorA <sup>151/P1.16</sup> F3     | CTCCAAGGTAATGAGCTGGACCAGGGTCAGGTTGTTGTTGGTGTCTT<br>TGGTGTAGTAGTCCACTTCCGATTTGGCG |
| fHbp <sup>V1.1</sup> :PorA <sup>267/P1.16</sup> R2     | AAGCCGATTACTACACCAAAGACACCAACAACAACCTGACCCTGGT<br>CAAACGCCAT                     |
| fHbp <sup>V1.1</sup> :PorA <sup>267/P1.16</sup> F3     | ATGGCGTTTGACCAGGGTCAGGTTGTTGTTGGTGTCTTTGGTGTAGT<br>AATCCGGCTT                    |
| fHbp <sup>V1.1</sup> :PorA <sup>294/P1.16</sup> R2     | TACTACACCAAAGACACCAACAACAACCTGACCCTGGTCAAAGCCCA<br>GGAA                          |
| fHbp <sup>V1.1</sup> :PorA <sup>294/P1.16</sup> F3     | GACCAGGGTCAGGTTGTTGTTGGTGTCTTTGGTGTAGTAGCCAAAGA<br>TACC                          |
| fHbp <sup>V1.1</sup> :PorA <sup>117/P1.16</sup> R2     | GACCAGGGTCAGGTTGTTGTTGGTGTCTTTGGTGTAGTATTGTGCCG<br>CCAGCTTCAGCTTT                |
| fHbp <sup>V1.1</sup> :PorA <sup>117/P1.16</sup> F3     | TACTACACCAAAGACACCAACAACAACCTGACCCTGGTCGCGGAAAA<br>AACTTATGGAAACGGTGAC           |
| fHbp <sup>V1.1</sup> :PorA <sup>183/P1.16</sup> R2     | GACCAGGGTCAGGTTGTTGTTGGTGTCTTTGGTGTAGTACGAATCTT<br>GTATTTGCTCGGTCTGAAAGG         |
| fHbp <sup>V1.1</sup> :PorA <sup>183/P1.16</sup> F3     | TACTACACCAAAGACACCAACAACAACCTGACCCTGGTCCATTCCGG<br>GAAGATGGTTGCG                 |
| fHbp <sup>V1.1</sup> :PorA <sup>309/P1.16</sup> R2     | GACCAGGGTCAGGTTGTTGTTGGTGTCTTTGGTGTAGTATACGGTTT<br>TCACTTCCGCGCTGC               |
| fHbp <sup>V1.1</sup> :PorA <sup>309/P1.16</sup> R4     | GTTCTCGAGTTGCTTGGCAGCAAGACCGATATGGCGTATGCCGACC<br>AGGGTCAGGTTGTTGTTGG            |
| fHbp <sup>V1.4</sup> :PorA <sup>151/P1.16</sup> R1     | CGGGACCAGCGTCAGGTTGTTATTTGTATCCTTGGTATAGTAGTCCA<br>CTTCGATTTGACGGATAAAGTCG       |
| fHbp <sup>V1.4</sup> :PorA <sup>151/P1.16</sup> F2     | TACTATACCAAGGATACAAATAACAACCTGACGCTGGTCCCGCAGCT<br>CATTACCTTGGAGAGCGGAG          |
| fHbp <sup>V1.4</sup> :PorA <sup>309/P1.16</sup> R1     | CGGGACCAGCGTCAGGTTGTTATTTGTATCCTTGGTATAGTATGCCG<br>TTTCCACTTCTGCGCTGC            |
| fHbp <sup>V1.4</sup> :PorA <sup>309/P1.16</sup> R2     | ATACTCGAGTTGCTTTGCAGCAAGACCAATATGTCGTATTCCCGGGA<br>CCAGCGTCAGG                   |
| fHbp <sup>V1.4</sup> :PorA <sup>151/P1.1.10_1</sup> R1 | CGGCACCAGGGTTGGCGGTTGGTTCTGTTTATTCTGGTCCACTTCGA<br>TTTGACGGATAAAGTCG             |
| fHbp <sup>V1.4</sup> :PorA <sup>151/P1.1.10_1</sup> F2 | CAGAATAAACAGAACCAACCGCCAACCCTGGTGCCGCAGCTCATTAC<br>CTTGGAGAGCGGAG                |
| fHbp <sup>V1.4</sup> :PorA <sup>151/P1.14</sup> R1     | AGCGTGAACCATTTTCTTTTCATCCACATAGTCCACTTCGATTTGACG<br>GATAAAGTCG                   |
| fHbp <sup>V1.4</sup> :PorA <sup>151/P1.14</sup> F2     | TATGTGGATGAAAAGAAAATGGTTCACGCTCAGCTCATTACCTTGA<br>GAGCGGAG                       |
| fHbp <sup>V1.4</sup> :PorA <sup>151/P1.15</sup> R1     | CGGTACAAAAACATCTGCGTTATTTTGGACGGGTATAATGGTCCACTTC<br>GATTTGACGGATAAAGTCG         |
| fHbp <sup>V1.4</sup> :PorA <sup>151/P1.15</sup> F2     | CATTATACCCGTCAAATAACGCAGATGTTTTTGTACCGCAGCTCATT<br>ACCTTGGAGAGCGGAG              |
| fHbp <sup>V3.45</sup> :PorA <sup>158/P1.4</sup> R1     | CGGTACATGGGTTGCCACTTTATTATTACAACAACATGGTCCACTTC<br>GATTTTTTGCACAAAGTCG           |
| fHbp <sup>V3.45</sup> :PorA <sup>158/P1.4</sup> F2     | CATGTTGTTGTGAATAATAAAGTGGCAACCCATGTACCGCAAACCAT<br>CACGCTGGCAAGC                 |
| fHbp <sup>V3.45</sup> :PorA <sup>158/P1.9</sup> R1     | TGCGTGGTATTTAGACTGTTCTGTCTACGTAGTCCACTTCGATTTTTT<br>CACAAAGTCG                   |
| fHbp <sup>V3.45</sup> :PorA <sup>158/P1.9</sup> F2     | TACGTAGACGAACAGTCTAAATACCACGCACAAACCATCACGCTGGC<br>AAGC                          |

|                 |                                                 |
|-----------------|-------------------------------------------------|
| PorA KO F1      | GCTTCAGCACCTTAGAGAATCG                          |
| PorA KO R1      | CGCTATCAGGATCCAATCACTAGTGCTGGTAGTTCCTGCCTTCC    |
| PorA KO F2      | GGAGATAGTTATTATAAACTACAAGTGGATATTGTGGGACGACCGAA |
| PorA KO R2      | ATTGCCGCCAC                                     |
| PorA(tet) KO F1 | CGTGGGAATGACAATTCGAGACCT                        |
| PorA(tet) KO R1 | CCAGGACATATGGATTTCTTAGCAGAAGTA                  |
| PorA(tet) KO R1 | GGCTCTTTTAGTTCTATCTCCACATGATACT                 |

---



**Supplementary Table 5: Data collection and refinement statistics.**

| ChA                                     | fHbp <sup>V1.4</sup><br>PorA <sup>151/P1.16</sup> | fHbp <sup>V1.1</sup><br>PorA <sup>294/P1.16</sup> | fHbp <sup>V1.4</sup><br>PorA <sup>309/P1.16</sup> | fHbp <sup>V1.1</sup><br>PorA <sup>309/P1.16</sup> |
|-----------------------------------------|---------------------------------------------------|---------------------------------------------------|---------------------------------------------------|---------------------------------------------------|
| PDB Code                                | 5nqp                                              | 5nqx                                              | 5nqy                                              | 5nqz                                              |
| <b>Data collection statistics</b>       |                                                   |                                                   |                                                   |                                                   |
| Beamline                                | Diamond I02                                       | Diamond I02                                       | ESRF ID29                                         | Diamond I04-1                                     |
| Wavelength (Å)                          | 0.97949                                           | 0.97858                                           | 0.97623                                           | 0.92818                                           |
| Space group                             | C222 <sub>1</sub>                                 | P22 <sub>1</sub> 2 <sub>1</sub>                   | P2 <sub>1</sub> 2 <sub>1</sub> 2 <sub>1</sub>     | C2                                                |
| Resolution limits (Å) <sup>a</sup>      | 40.74-2.86<br>(2.93-2.86)                         | 81.65-3.66<br>(3.76-3.66)                         | 51.17-2.60<br>(2.67-2.60)                         | 58.55-1.63<br>(1.67-1.63)                         |
| Unit cell dimensions<br>(Å, °)          | 100.7,171.4,131.5<br>90,90,90                     | 94.6,114.9,160.3<br>90,90,90                      | 56.9,62.6,88.7<br>90,90,90                        | 91.4,76.3,83.9<br>90,91.3,90                      |
| Unique reflections                      | 26403<br>(1923)                                   | 19820<br>(1431)                                   | 10208<br>(743)                                    | 70772<br>(4967)                                   |
| Multiplicity <sup>a</sup>               | 4.5<br>(4.4)                                      | 4.4<br>(4.6)                                      | 6.4<br>(6.6)                                      | 3.0<br>(2.2)                                      |
| Completeness (%) <sup>a</sup>           | 99.1<br>(99.4)                                    | 99.3<br>(99.9)                                    | 99.6<br>(99.4)                                    | 98.6<br>(93.9)                                    |
| $\  \langle I \rangle \ $ <sup>a</sup>  | 17.1<br>(2.0)                                     | 7.6<br>(1.9)                                      | 16.7<br>(2.3)                                     | 12.7<br>(1.5)                                     |
| $R_{\text{merge}}$ (%) <sup>a,b</sup>   | 0.074<br>(0.645)                                  | 0.187<br>(0.833)                                  | 0.073<br>(0.845)                                  | 0.062<br>(0.615)                                  |
| $R_{\text{pim}}$ (%)                    | 0.038<br>(0.340)                                  | 0.101<br>(0.439)                                  | 0.032<br>(0.356)                                  | 0.041<br>(0.534)                                  |
| <b>Refinement statistics</b>            |                                                   |                                                   |                                                   |                                                   |
| Resolution limits (Å)                   | 40.74-2.86<br>(2.97-2.86)                         | 81.65-3.66<br>(3.85-3.66)                         | 51.17-2.60<br>(2.86-2.60)                         | 58.55-1.63<br>(1.67-1.63)                         |
| Number of reflections in<br>working set | 25137<br>(2746)                                   | 18807<br>(2650)                                   | 9665<br>(2369)                                    | 63880<br>(4735)                                   |

|                                               |                  |                  |                  |                  |
|-----------------------------------------------|------------------|------------------|------------------|------------------|
| Number of reflections in test set             | 1238<br>(134)    | 975<br>(121)     | 498<br>(120)     | 3445<br>(225)    |
| <i>R</i> factor of working set <sup>a,c</sup> | 0.198<br>(0.303) | 0.232<br>(0.321) | 0.226<br>(0.351) | 0.162<br>(0.289) |
| <i>R</i> <sub>free</sub> <sup>a,d</sup>       | 0.239<br>(0.351) | 0.282<br>(0.368) | 0.271<br>(0.420) | 0.194<br>(0.297) |
| Number of atoms (protein/water/other)         | 5895/28/84       | 9572/0/0         | 1994/4/4         | 4046/540/45      |
| Residues in Ramachandran favoured region (%)  | 95.2             | 97.8             | 95.3             | 97.0             |
| Ramachandran outliers (%)                     | 0.1              | 0.1              | 0.0              | 0.2              |
| r.m.s.d. bond lengths (Å)                     | 0.002            | 0.002            | 0.002            | 0.020            |
| r.m.s.d. bond angles (°)                      | 0.58             | 0.42             | 0.45             | 1.98             |

<sup>a</sup>Numbers in parentheses refer to the appropriate outer shell.

<sup>b</sup> $R_{\text{merge}} = 100 \times (\sum_{hkl} \sum_i |I(hkl;i) - \langle I(hkl) \rangle| / \sum_{hkl} \sum_i I(hkl;i))$ , where  $I(hkl;i)$  is the intensity of an individual measurement of a reflection and  $\langle I(hkl) \rangle$  is the average intensity of that reflection.

<sup>c</sup> $R_{\text{factor}} = (\sum_{hkl} ||F_{\text{obs}}| - |F_{\text{calc}}|| / \sum_{hkl} |F_{\text{obs}}|)$ , where  $|F_{\text{obs}}|$  and  $|F_{\text{calc}}|$  are the observed and calculated structure factor amplitudes.

<sup>d</sup> $R_{\text{free}}$  equals the *R*-factor of test set (5% of the data removed prior to refinement).

r.m.s.d.: root mean square deviation from ideal geometry.
